# Supplementary material for: Evaluation of the effect of CaD on the bone structure and bone metabolic changes in senile osteoporosis rats based on MLP–ANN methods
Source: Royal Society of Chemistry journal article supplement (doi:10.1039/c9fo01322a), 2019-01-01
Supplement: c9fo01322a1.pdf [file c9fo01322a1.pdf]

**Table 1.** Primer used for qRT-PCR

| Primer         | Forward(5'→3')           | Reverse(5'→3')            |
|----------------|--------------------------|---------------------------|
| ATP6v0d2       | CGAGGCATTCTACAAATTCTGCAA | TTCAGTGCCAAATGAGTTCAGAGTG |
| IGF-1          | GCACTCTGCTTGCTCACCTTTA   | TCCGAATGCTGGAGCCATA       |
| Wnt5a          | ACAGGCAGTGGCATGCAGA      | CAGGCAGCTGTTGACCTAGGAA    |
| M-CSF          | GAATACTGAACCTGCCTGCTGAA  | AGGCCAGCTCAGTGCAAGAA      |
| BMP2           | ACCGTGCTCAGCTTCCATCAC    | CTATTTCCCAAAGCTTCCTGCATT  |
| TGF- $\beta$ 1 | CATTGCTGTCCCGTGCAGA      | AGGTAACGCCAGGAATTGTTGCTA  |
| $\beta$ -actin | CACTTTCTACAATGAGCTGCG    | CTGGATGGCTACGTACATGG      |

**Table 2.** Independent variable importance

| Important Attribute Characteristics | Importance | Normalized Impirtance |
|-------------------------------------|------------|-----------------------|
| TGF- $\beta$ 1 mRNA                 | 0.052      | 100%                  |
| BMD                                 | 0.048      | 92.4%                 |
| Bs/Bv                               | 0.043      | 82.4%                 |
| Maximal load                        | 0.041      | 79.2%                 |
| Dry weight/volume                   | 0.039      | 74.3%                 |
| ALP in tibia                        | 0.038      | 72.8%                 |
| Body weight                         | 0.038      | 72.3%                 |
| BMP2 mRNA                           | 0.036      | 69.4%                 |
| TRACP in serum                      | 0.036      | 69.2%                 |
| TGF $\beta$ 1 protein               | 0.034      | 64.9%                 |
| bALP in serum                       | 0.033      | 63.3%                 |

---

|                       |       |       |
|-----------------------|-------|-------|
| TGFβ1 IOD             | 0.028 | 54.6% |
| BMP2 IOD              | 0.028 | 54.0% |
| Ash weight/dry weight | 0.028 | 54.3% |
| IGF-1 IOD             | 0.028 | 54.0% |
| ATP6v0d2 IOD          | 0.027 | 52.4% |

---

**Notes:** TGF-β1, Transforming growth factor beta1; BMD, bone mineral density; bALP, bone specific alkaline phosphatase; BMP2, bone morphogenetic protein 2; IGF-1, insulin-like growth factors 1.
